# Supplementary material
Source: publisher site journal article supplement (https://www.dovepress.com/article/555000)
Supplement: Supplementary file 1 [file Appendix.docx]

# Appendix 1: Search Strategy Documentation:

- Linking of synonyms using OR to cover the subject area as comprehensively as possible
- Using an asterisk (*) to:
  - Include plurals
  - Cover both “electronic” and “electronical”
  - Cover both “E health” and “e-health”
- Search terms address two subject areas derived from the objectives: electronic patient record and summarization of relevant information for care providers
- eHealth is not included as a search term because it is too general (it also encompasses health apps, etc.)
- Subject areas for the search terms were developed with the help of Mindmap and ECLIPSE 1
- MeSH on Demand was used to generate MeSH-Terms 2

# Thoughts on Topic Blocks

Limiting the search terms to the emergency department was excluded since preliminary searches revealed, for example, papers that contained patient data in preclinical care which could potentially be filtered to obtain information adaptable to the emergency department setting. Some decisions—such as whether to use X-ray contrast media—also need to be made, for example, in the inpatient setting; therefore, additional insights outside the emergency setting might be found.

Below, the search terms used are listed, each adapted for the respective databases (PubMed, IEEEXplore, and Scopus). The search terms consist of the sub-areas: emergency setting, individualized patient care, automated data filtering, and electronic patient record. Both keywords and MeSH terms were used. Additionally, the results were restricted to the last 10 years and limited to German and English. In Scopus, duplicates from PubMed were directly filtered out within the search query.

Pubmed:

(emergenc* OR accident OR casualty OR "Emergency Service, Hospital"[Mesh] OR "Emergency Medicine"[Mesh] OR "Emergency Medical Services"[Mesh]) AND ("decision making" OR "decision support" OR "clinical decision-making process" OR "clinical decision support" OR "CDS" OR "clinical decision support systems" OR "workflow" OR "clinical effectiveness" OR "personalized medicine" OR "Decision Support Systems, Clinical"[Mesh] OR "Workflow"[Mesh] OR "Precision Medicine"[Mesh] OR "Decision Making, Computer-Assisted"[Mesh] OR "Clinical Decision-Making"[Mesh] OR Triag*) AND ("Artificial Intelligence"[Mesh] OR "Data Management"[Mesh] OR "Medical Records Systems, Computerized"[Mesh] OR "Electronic Data Processing"[Mesh] OR "Artificial intelligence" OR AI OR algorithm OR standards OR HL7 OR "data processing" OR "data handling" OR "data management") AND ("patient data" OR "patient information" OR "electronic medical record" OR "electronic patient record" OR "electronic patient file" OR "electronic health record" OR "digital medical record" OR "digital patient record" OR "digital health record" OR "Electronic Health Records"[MeSH] OR "electronic documentation" OR "electronic health record") AND (y_10[Filter]) AND (english[Filter] OR german[Filter])

IEEEXplore:

(emergenc* OR accident OR casualty OR ("Mesh_Terms":Emergency Service, Hospital) OR ("Mesh_Terms":Emergency Medicine) OR ("Mesh_Terms":Emergency Medical Services)) AND ("decision making" OR "decision support" OR "clinical decision-making process" OR "clinical decision support" OR "CDS" OR "clinical decision support systems" OR "workflow" OR "clinical effectiveness" OR "personalized medicine" OR ("Mesh_Terms":Decision Support Systems, Clinical) OR ("Mesh_Terms":Workflow) OR ("Mesh_Terms":Precision Medicine) OR ("Mesh_Terms":Decision Making, Computer-Assisted) OR ("Mesh_Terms":Clinical Decision-Making) OR Triag*) AND (("Mesh_Terms":Artificial Intelligence) OR ("Mesh_Terms":Data Management) OR ("Mesh_Terms":Medical Records Systems, Computerized) OR ("Mesh_Terms":Electronic Data Processing) OR "Artificial intelligence" OR AI OR algorithm OR standards OR HL7 OR "data processing" OR "data handling" OR "data management") AND ("patient data" OR "patient information" OR "electronic medical record" OR "electronic patient record" OR "electronic patient file" OR "electronic health record" OR "digital medical record" OR "digital patient record" OR "digital health record" OR ("Mesh_Terms":Electronic Health Records) OR "electronic documentation" OR "electronic health record")

Scopus:

TITLE-ABS-KEY ( ( emergenc* OR accident OR casualty ) AND ( "decision making" OR "decision support" OR "clinical decision-making process" OR "clinical decision support" OR "CDS" OR "clinical decision support systems" OR "workflow" OR "clinical effectiveness" OR "personalized medicine" OR "Precision Medicine" OR triag* ) AND ( "Medical Records Systems" OR "Artificial intelligence" OR ai OR algorithm OR standards OR hl7 OR "data processing" OR "data handling" OR "data management" ) AND ( "patient data" OR "patient information" OR "electronic medical record" OR "electronic patient record" OR "electronic patient file" OR "electronic health record" OR "digital medical record" OR "digital patient record" OR "digital health record" OR "electronic documentation" OR "electronic health record" ) ) AND PUBYEAR > 2012 AND PUBYEAR < 2024 AND NOT DBCOLL ( medl ) AND ( LIMIT-TO ( LANGUAGE , "English" ) OR LIMIT-TO ( LANGUAGE , "German" ) )

# SPIDER Framework:3

**Search terms predefined using the SPIDER Framework:**

- Sample: clinicians in emergency settings
- Phenomen of intrest: automated filtering of EHR data
- Design: studies involving electronic health records
- Evaluation: outcomes related to usability and clinical decision-making
- Research Type: not explicitly predefined

**Sample:**

(emergenc* OR accident OR casualty OR "Emergency Service, Hospital"[Mesh] OR "Emergency Medicine"[Mesh] OR "Emergency Medical Services"[Mesh])

**Phenomen of intrest:**

("Artificial Intelligence"[Mesh] OR "Data Management"[Mesh] OR "Medical Records Systems, Computerized"[Mesh] OR "Electronic Data Processing"[Mesh] OR "Artificial intelligence" OR AI OR algorithm OR standards OR HL7 OR "data processing" OR "data handling" OR "data management")

**Design:**

("patient data" OR "patient information" OR "electronic medical record" OR "electronic patient record" OR "electronic patient file" OR "electronic health record" OR "digital medical record" OR "digital patient record" OR "digital health record" OR "Electronic Health Records"[MeSH] OR "electronic documentation" OR "electronic health record") AND (y_10[Filter]) AND (english[Filter] OR german[Filter])

**Evaluation:**

("decision making" OR "decision support" OR "clinical decision-making process" OR "clinical decision support" OR "CDS" OR "clinical decision support systems" OR "workflow" OR "clinical effectiveness" OR "personalized medicine" OR "Decision Support Systems, Clinical"[Mesh] OR "Workflow"[Mesh] OR "Precision Medicine"[Mesh] OR "Decision Making, Computer-Assisted"[Mesh] OR "Clinical Decision-Making"[Mesh] OR Triag*)

**Research Type: /**

# Appendix 2 - Reported Outcomes

| **Results** | **Fadel et al.** | **Gray et al.** | **Thayer et al** |
| --- | --- | --- | --- |
| **Date of Publication** | 2021 | 2022 | 2021 |
| **Name of study** | Visual Analytics Dashboard Promises to Improve Hypertension Guideline Implementation | Patient information items needed to guide the allocation of scarce life-sustaining resources: a Delphi study of multidisciplinary experts | Human-centered development of an electronic health record-embedded, interactive information visualization in the emergency department using fast healthcare interoperability resources |
| **Method** | Performance comparison of primary care physicians using EHR and visual dashboard for treating patients with hypertension | Three rounds of the Delphi method with 44 multidisciplinary experts. They also tested data entry time for 10 random samples of patient EHRs. | 1) Semistructered interviews for design developemt requirments 2) Application design  3) System comparison  4) Development using SMART, FHIR and HL7  5) Postimplementation evaluation |
| **Studydesign** | Prospective, Quantative, Experimental | Qualitative | Qualitative, Quantitative (Mixed Methods) |
| **Population** | 35 primary care physicians | 50 multidisciplinary experts | 1) Cognitive Task Analysis and Design n=25 2) Application design  3) Preimplementation System comparison n=12 4) Intervention Development n=7 5) Postimplementation evaluation n=50 |
| **Place** | USA, Detroit, Michigan | USA, Washington | USA, Pennsylvania |
| **Objective** | Comparing usefullness of EHR vs visual dashboard | Determination of relevant patient data items for a triage overview for COVID-19 | Development and evaluation of an interactive information visualisation dashboard for asthma in a children's hospital emergency department. |
| **Key Findings** | Patient case completion time using the visual dashboard was shorter than using the EHR alone. More correct treatment decissions were made using the visual dashboard. Physicions rated the visual dashboard easier to use. 95% would use the visual dashboard for patient's hypertension management. | 24 patient information items reached the 80% threshold and were included in the final form including patient preferences for care, age, selceted comorbidities (chronic lung, heart, liver, oncologic, and kidney diseases), presence of limited life ecpactancy, duration of and reason for hospitalization, scpecific information on the severity of the current illness and clinical trajactory. The testing of data entry took a median time of 227 seconds. Identifinying all relevant comorbidities and admission diagnosis took the longest. | The asthma application showed a statistically significant reduction in the time it took to complete the task. It reduced cognitive load for the clinicians. Also it improved the inforamtion retrieval accuracy of specific asthma-related data points. Feedback for the application was positive. The visualization and summarization provided substatial clinical value. |
| **Method used for automatization** | Calculation of atheriosclerotic cardiovascular disease risk score from avaibalbe EHR data; Calculation of target blood pressure based on guidelines, and relevant social or dietary factors. All data were available in EHR | Manual entry of patient data | unclear, potantially automatic |
| **Determing the relevant parameters** | Asking primary care clinicians and ACCAHA guidlines | Delphi method with 50 multidisciplinary experts. Inclusion: Agreement ≥ 80 % in Delphi round, another Delphi round: 70 % ≤ Agreement < 80 %, excluded: Agreement < 70% | semistructered Interviews with 11 clinicians in the ED |
| **Parameters for overview about the patient** |  |  |  |
| **Allergies** |  |  | Included |
| **Medication** | Antihypertensice medication |  | Medication: Systemic steroid, controller |
| **Vital Signs** | Blood pressure |  |  |
| **Risk Score** | Atherosclerotic cardiovascular disease risk score |  |  |
| **Risk Factors** | Social and Dietary factors |  |  |
| **Decission Support** | Recommendations and treatment plan for target blood pressure, Medications, Diet |  | Asthma Care Plan |
| **Patient identification** |  | Patient traige identifier for tracking through triage |  |
| **Prefernces for care** |  | Prefernces for ICU Interventions or limitations for ICU care |  |
| **Personal data** |  | Age in years |  |
| **Comorbidities/conditions** |  | Pregnancy | Chronic kidney, lung, atery, liver disease | Heart failure | Malignancy | Pre existing or persitent coma or vegetive state | severe trauma with low chance of survival | severe burns with low chance of survival | other major relevant comorbidities |  |
| **Severity** |  | Severity of medical comorbidity - severe, terminal/end-stage |  |
| **Life expectancy** |  | death within 6 months is expected |  |
| **Hospitalization information** |  | Days since admission for this hospitalization ( Patient's primary hospitalization diagnosis) |  |
| **Current clinical status** |  | Current level of respiratory support | Severity of ARDS | Does the patient meet ICU admission criteria | Indications for admission to the ICU | Covid-19 test status | Patient's responds to current treatment | |  |
| **Medical History** |  |  | Visits to the ICU, Emergency visits, Primary care visits, Pulmonary visits |
| **Emergency data** |  |  |  |
| **Critical information** |  |  |  |
| **Order History** |  |  |  |
| **Current status** |  |  |  |
| **Future Actions** |  |  |  |
| **Plan** |  |  |  |
| **Events feed** |  |  |  |
| **Care team** |  |  |  |
| **Triage** |  |  |  |
| **Interventions** |  |  |  |
| **Lab results** |  |  |  |
| **Timeline** |  |  |  |
| **Summerization in own words:** | Fadel et al. describe in their prospective quasi-experimental work “Visual Analytics Dashboard Promises to Improve Hypertension Guideline Implementation” (56) the implementation and evaluation of a visual dashboard for the management of hypertension in primary care. The dashboard was developed after questioning clinicians about the main information they need to manage cardiovascular patients. This resulted in the parameters: recent blood pressure, timeline of hypertensive medication prescribing, the patient’s atherosclerotic cardiovascular disease risk score, targeted blood pressure based on guidelines, and relevant social or dietary factors . Using two simulations of patient cases – one using only the EHR and one using the visual Dashboard and the EHR – they asked 35 physicians to review the cases, measuring the time they needed to screen the patient’s information, the accuracy making guideline conform decisions and their satisfaction about using the visual dashboard. The results showed the visual dashboard decreased the time to screen patient’s information and increased the accuracy of guideline conform decisions. The most participants (95 %) would use the visual dashboard in real patient contacts. | Gray et al. describe in their study “Patient information items needed to guide the allocation of scarce life-sustaining resources: a Delphi study of multidisciplinary experts” (57) the process to finding relevant patient information items for triage using a Delphi design. In three rounds of the Delphi study, they asked forty-four experts from different fields, which patient information is important to know for triage especially in situation with scarce resources like the Covid-19 pandemic. They agreed to include 24 items in the final triage form. The parameters included are preferences for care, age, comorbidities, limited life expectancy, duration and reason for hospitalization, specific information about severity of current illness and the clinical trajectory . When measuring the time to enter all the relevant information from the electronic health record into the triage form, it took around 227 seconds. They discussed however the feasibility y of collecting the data manually. | Thayer et al developed and tested a Asthma Timeline Application in their study “Human-centered development of an electronic health record-embedded, interactive information visualization in the emergency department using fast healthcare interoperability resources” (58). In human centered design approach, the multidisciplinary team, began by conducting semi-structured interviews to find out the relevant information for treating patients with asthma in the emergency department and the use of the electronic health record (EHR). Based on the interviews an application design was created with recurring user feedback rounds. Before implementing the asthma timeline application, it was tested against a standard EHR workflow to ensure effectiveness. The development adhered to established standards, including HL7, FHIR, and SMART. After deploying the application, its usage and impact were evaluated through a user survey. In the interviews, all participants stated difficulties finding information in the EHR. The relevant information stated were an overview about patients’ medical history like encounters and medications, outpatient treatment, temporal connections, information from previous encounters and additional care tools. When tested the application significantly lowered task completion time compared to the standard EHR, reduced cognitive load, higher usability scores and a more accurate retrieval of information. After implementation the evaluation showed a higher user satisfaction. |
| **Quality of Study (Mixed Methods Appraisal Tool)** | 3 out of 5 quality criteria are fulfilled | 5 out of 5 quality criteria are fulfilled | 5 out of 5 quality criteria are fulfilled |

| **Results** | **Rohrer** | **Korach et al.** | **Wang et al.** | **Curran et al.** |
| --- | --- | --- | --- | --- |
| **Date of Publication** | 2017 | 2021 | 2019 | 2020 |
| **Name of study** | Electronic health record in prehospital care | Unsupervised clinical relevancy ranking of structured medical records to retrieve condition-specific information in the emergency department | Design and Evaluation of an Integrated, Pateint-Focused Electronic Health Record Display for Emergency Medicine | Integrated displays to improve chronic disease management in ambulatory care: A SMART on FHIR application informed by mixed-methods user testing |
| **Method** | Semistructered Interviews | 1) Data Collection for training machine learning algorithm  2) Development of ranking methods by Delphi circles to determine relevancy of medications and problems regarding each chief complaint 3) Evaluation and comparison of each method | The Participants familiarized themselves with the interface. Then they had to complete different patient care-related scenarios and they had to interact with the prototype display and make clinical decisions about the patient. Finally the participants rated the interface in usabulity, usefulness and frequency of use. | Participants completed case scenarios using standart EHR procedures or the new EHR Dashboard. They were randomized if they first interacted with the new Dashboard or the standart EHR procedure. After each case the participants filled in a surevey and took part in a semi-structered interview. The test was analzyed using Tobii Pro. |
| **Studydesign** | Qualitative (self explained Mixed Methods) | Prospective, Quantative descriptiv, Quasi-experimental | Prospective, experimental usability testing and mixed method analysis | Mixed Methods Design |
| **Population** | 4 Paramedics, 3 Physicians | 1) Data for unsupervised ranking method: 100.000 ED encounter in the year 2016 at AMC 2) Data for gold standard were manually collected by three physicians from 99 patients encounters randomly collected at AMC 3) Knowledge based ranking developed through delphy circles by five experts to determine the relevant clinical items for each cheif complaint | 20 clinicians currently working in an ED (10 nurses, 10 physicians) | 13 primary care doctors randomly selected |
| **Place** | Vienna Austria | USA, Colorado at Anschutz Medical Campus (AMC) | USA, New York | USA, Utah |
| **Objective** | Defining requirments for electronic documentation and which data is required at the emergency scene in the prehospital care. | Evaluating a unsupervised machine learning method for retrieving relevant patient data from the EHR and comparing it to a knowledge based ranking and a gold standart method. | Evaluate a status display for Emergency Medicine, employing work-centered usabilty methods. | Develop and evaluate a EHR application that uses an integrated display to support ambulatory providers in the management common chronic diseases, starting with COPD, hypertension and diabetes. |
| **Key Findings** | The most relevant data from ELGA for patient treatment in prehospital setting is information gathered from medical discharge letter or the e-Medication contained in ELGA. | They found that a data-driven unsupervised machine learning method can efficiently approximate or outperform knowledge-based relevancy ranking of clinical information. | The participants rated the display/interface positivly. Espessially high rating was for critical medical information about the patients medical history. However tasked completion was variable between the physicians and they didn't always used the best treatmentplan, so that further improvements are needed. | Performance was significantly better using the new Dashboard, thy performed more recommended care tasks, keystrokes per task were reduced. They spend more time in the disease manager than the usual EHR. Participants slightly preferred the Disease Manager. The qualitive analysis showed an overall distrust in the information in the EHR. |
| **Method used for automatization** | Discussed possible automatization | Machine learning trained by 100.000 patient encounters | Manually entered patient cases as examples | Not clear. Automatic integration in the EHR |
| **Determing the relevant parameters** | Observations and interviews | Unsupervised machine learhning algorithm | Concept design by developer team, three ED providers, two experts in human factors, four experts in human interface and software design based on the results of prior studies on ED nurse and physician information needs | A team of clinical informaticists, sociotechnical experts, software developers and clinical champions developed the dashboard and decided the relevant parameters together with a team of clinical providers in pulmonology and primary care, this was cross-referenced to the 2019 GOLD guidelines |
| **Parameters for overview about the patient** |  |  |  |  |
| **Allergies** | Allergies |  | Included |  |
| **Medication** | Medications | Medication | Home Medication list, ED medications administered | Medications regarding COPD |
| **Vital Signs** | Vital signs measured at scene |  | Triage vital signs |  |
| **Risk Score** |  |  | Glasgow Coma Score | COPD Stage |
| **Risk Factors** | Risk factors |  |  | Smoking Cessation, Influenza vaccination, pneumococcal vaccination, lung cancer screening |
| **Decission Support** |  |  |  | Recommended actions |
| **Patient identification** | Insurance data |  | Bed number, date of their last time in the ED, mode of arrival, date of last encounter with health system |  |
| **Prefernces for care** | DNR orders other legal regulations |  |  |  |
| **Personal data** | Personal data | Patient age | Patient demographics (Name, age, gender, weight) |  |
| **Comorbidities/conditions** | Known diseases/Medical history |  |  |  |
| **Severity** |  |  |  |  |
| **Life expectancy** |  |  |  |  |
| **Hospitalization information** |  |  |  |  |
| **Current clinical status** |  | Chief complaint back pain, chest pain, both | Chief complaint and current problems |  |
| **Medical History** | patient history |  | medical history | Oxygen supplementation, pulmonary rehabilitation |
| **Emergency data** | Environmental factors, case data, emergency protocol, resulting diagnosis, treatment and transport |  |  |  |
| **Critical information** |  |  | Included |  |
| **Order History** |  |  | what orders were entered for the patient since arrival with status update |  |
| **Current status** |  |  | What is the current patient status -> most up-to date information available regarding current treatment. |  |
| **Future Actions** |  |  | Upcoming tasks |  |
| **Plan** |  |  | Clinical plan for the patient |  |
| **Events feed** |  |  | Chronological display of each activity associated with a patient |  |
| **Care team** |  |  | Care Team members |  |
| **Triage** |  |  | Triage note linked |  |
| **Interventions** |  |  | Number and type of tubes (catheters) |  |
| **Lab results** |  |  | Current lab results |  |
| **Timeline** |  |  | Graphical display of all events during the patient's stay |  |
| **Summerization in own words:** | Rohrer described in her study “Electronic health record in prehospital care” (59) a mixed-method approach to model the workflow and information requirements in the prehospital care. She conducted seven expert interviews with prehospital staff and created a workflow from arriving at the scene of the incident to bringing the patient to the hospital. Based on these findings she developed an overview about the required and relevant data from the electronic patient record in the prehospital setting. From the interviews she concluded following data as relevant: Emergency data (environmental factor, patient history, vital signs, case data, emergency protocol, resulting diagnosis, treatment and transport), Patient data (personal data, insurance data), medication, medical history (known diseases, allergies, risk factors, legal regulations). She points out that the data entry could be automated to ease the process in the ambulance. Furthermore, the patient data could support the handover in the hospital, but also the treatment given in the prehospital setting and would therefore help the patient’s outcome. | Korach et al. developed and tested in their study “Unsupervised clinical relevancy ranking of structured medical records to retrieve condition-specific information in the emergency department” (60) an unsupervised machine learning model to filter relevant patient data from the electronic patient record. They compared it to a knowledge-based version developed by experts in the field. The two approaches were created to rank relevancy of the medication and problems with the main chief complaint. Both models were compared to a gold standard developed manually by three clinicians. Overall, both models compared well ranking the medication, however performed lower ranking the problems to the chief complaint. The knowledge-based model outperformed slightly the unsupervised model regarding the medication and vice versa. However, the authors conclude that a unsupervised machine learning method can be an effective and time saving tool to approximately rank relevant clinical information. This can be useful for summarization of data and retrieval of specific data from the EHR. | In their study "Design and Evaluation of an Integrated, Patient-Focused Electronic Health Record Display for Emergency Medicine", Wang et al. tested a prototype patient status display in the emergency department. They worked with an interdisciplinary research team to develop a display based on the results of a previous study. The study focused on usability testing and user-centred design of the dashboard. The final design was tested with 20 clinicians using de-identified real patient cases. Data was entered manually. Participants were then given various tasks to simulate a real patient encounter using the prototype dashboard. The participants were then able to rate the usability and usefulness of the dashboards. Overall, participants rated the dashboard as useful. However, physician performance using the dashboard varied across patient encounters. This leaves room for future improvements, such as clinical decision support tools or highlighting of critical values. The testing was limited by the fact that the prototype wasn't fully functional and lacked interactivity. | In the study “Integrated Display to Improve Chronic Disease Management in Ambulatory Care: A SMART on FHIR Application Informed by Mixed Methods User Testing” by Curran et al., a new EHR dashboard was developed and evaluated to improve the management of chronic diseases in ambulatory care settings. The dashboard was built using SMART on FHIR technology and tested with 13 primary care physicians. Participants used both the new dashboard and the standard EHR interface to manage simulated patient cases. Overall, participants completed more recommended care tasks when using the prototype, although this required more time compared to the standard EHR. Physicians slightly preferred the new dashboard, and qualitative analyses revealed enthusiasm about the integrated display’s potential, alongside concerns about the time investment required to learn new workflows. A limitation of the study was the small sample size, which was sufficient for qualitative insights but restricted the robustness of the quantitative analyses. |
| **Quality of Study (Mixed Methods Appraisal Tool)** | 2 out of 5 quality criteria are fulfilled | 5 out of 5 quality criteria are fulfilled | 4 out of 5 quality criteria are fulfilled | 5 out of 5 quality criteria are fulfilled |

1. Wildridge V, Bell L. How CLIP became ECLIPSE: a mnemonic to assist in searching for health policy/management information. *Health Information & Libraries Journal*. 2002;19(2):113-115. doi:10.1046/j.1471-1842.2002.00378.x
2. MeSH Browser. July 18, 2023. Accessed July 18, 2023. https://meshb.nlm.nih.gov/MeSHonDemand?_gl=1*usm07o*_ga*MTkwMzc2Mjk5NS4xNjg4NjM4NDM3*_ga_7147EPK006*MTY4OTY2Mjk4Ny4xLjEuMTY4OTY2MzQ0OC4wLjAuMA..*_ga_P1FPTH9PL4*MTY4OTY2Mjk4Ny4xLjEuMTY4OTY2MzQ0OC4wLjAuMA..
3. Methley AM, Campbell S, Chew-Graham C, McNally R, Cheraghi-Sohi S. PICO, PICOS and SPIDER: a comparison study of specificity and sensitivity in three search tools for qualitative systematic reviews. *BMC Health Services Research*. 2014;14(1):579. doi:10.1186/s12913-014-0579-0
